# Supplementary material
Source: PubMed Central journal article supplement (PMC5454509)
Supplement: supp_M074427_jlr.M074427-1.pdf [file supp_M074427_jlr.M074427-1.pdf]

## Kidney triglyceride accumulation in the fasted mouse is dependent upon serum free fatty acids.

Diego Scerbo<sup>1,2</sup>, Ni-Huiping Son<sup>1</sup>, Alaa Sirwi<sup>3</sup>, Lixia Zeng<sup>4</sup>, Kelli M. Sas<sup>4</sup>, Vincenza Cifarelli<sup>5</sup>, Gabriele Schoiswohl<sup>6,8</sup>, Lesley-Ann Huggins<sup>1</sup>, Namrata Gumaste<sup>1</sup>, Yunying Hu<sup>1</sup>, Subramaniam Pennathur<sup>4</sup>, Nada A. Abumrad<sup>5</sup>, Erin E. Kershaw<sup>6</sup>, M. Mahmood Hussain<sup>3</sup>, Katalin Susztak<sup>7</sup>, Ira J. Goldberg<sup>1</sup>

| Gene Name | Ensembl Gene ID    | Alog2  | padj  | Fed       |          |          |          | Fasted   |          |          |          |
|-----------|--------------------|--------|-------|-----------|----------|----------|----------|----------|----------|----------|----------|
| Acer2     | ENSMUSG00000038007 | 0.392  | 0.121 | 500.898   | 776.04   | 1010.29  | 507.89   | 706.85   | 1097.76  | 1195.03  | 784.25   |
| Acer3     | ENSMUSG00000030760 | 0.170  | 0.238 | 882.712   | 797.21   | 643.27   | 792.44   | 850.08   | 925.51   | 891.00   | 819.82   |
| Arsa      | ENSMUSG00000022620 | -0.161 | 0.347 | 361.718   | 323.12   | 399.91   | 386.56   | 323.66   | 325.21   | 267.59   | 353.00   |
| Asah1     | ENSMUSG00000031591 | -0.158 | 0.208 | 2952.544  | 2619.00  | 2353.39  | 2551.27  | 2185.65  | 2407.62  | 2338.28  | 2201.60  |
| Asah2     | ENSMUSG00000024887 | 0.058  | 0.675 | 3059.720  | 3469.61  | 2958.51  | 3524.10  | 3295.21  | 3199.44  | 3648.40  | 3366.42  |
| B4galt6   | ENSMUSG00000056124 | -0.409 | 0.016 | 770.326   | 812.86   | 891.89   | 547.62   | 526.42   | 470.47   | 609.03   | 541.51   |
| Cerk      | ENSMUSG00000035891 | 0.249  | 0.143 | 745.021   | 897.55   | 782.71   | 595.94   | 878.91   | 1018.06  | 999.38   | 904.29   |
| Cers2     | ENSMUSG00000015714 | 0.071  | 0.721 | 5180.163  | 5217.76  | 3800.42  | 5054.22  | 4844.70  | 5929.70  | 4968.12  | 4794.44  |
| Cers3     | ENSMUSG00000030510 | 0.143  | NA    | 2.233     | 4.60     | 3.95     | 6.44     | 7.44     | 5.14     | 1.92     | 6.22     |
| Cers4     | ENSMUSG00000008206 | 0.165  | 0.262 | 250.077   | 263.28   | 231.52   | 260.93   | 273.44   | 281.51   | 269.51   | 319.21   |
| Cers5     | ENSMUSG00000023021 | 0.039  | 0.833 | 1193.819  | 1204.10  | 1014.23  | 1195.10  | 1157.93  | 1102.90  | 1257.38  | 1080.35  |
| Cers6     | ENSMUSG00000027035 | -0.082 | 0.526 | 2834.204  | 2737.76  | 2755.93  | 2728.44  | 2511.17  | 2601.72  | 2991.42  | 2596.40  |
| Degs1     | ENSMUSG00000038633 | -0.383 | 0.001 | 5157.835  | 4875.31  | 4302.93  | 4924.29  | 3543.54  | 3977.13  | 3199.54  | 3344.19  |
| Degs2     | ENSMUSG00000021263 | 0.022  | 0.945 | 1215.403  | 1130.45  | 776.13   | 1407.71  | 1023.07  | 1416.55  | 1135.57  | 981.65   |
| Gal3st1   | ENSMUSG00000049721 | -0.263 | 0.067 | 711.528   | 624.14   | 516.98   | 528.29   | 503.16   | 502.60   | 464.20   | 521.06   |
| Galc      | ENSMUSG00000021003 | -0.234 | 0.127 | 2872.162  | 2816.01  | 3835.94  | 2738.10  | 2565.11  | 2929.50  | 2553.11  | 2355.43  |
| Gba       | ENSMUSG00000028048 | -0.111 | 0.356 | 980.956   | 1013.54  | 823.49   | 945.99   | 875.19   | 862.53   | 846.88   | 874.95   |
| Gba2      | ENSMUSG00000028467 | -0.146 | 0.409 | 366.184   | 374.67   | 415.69   | 414.47   | 386.91   | 362.49   | 373.09   | 376.12   |
| Gla       | ENSMUSG00000031266 | 0.117  | 0.559 | 193.512   | 208.05   | 161.80   | 219.05   | 198.10   | 210.81   | 218.67   | 201.84   |
| Glb1      | ENSMUSG00000045594 | -0.256 | 0.109 | 4601.861  | 4898.32  | 4287.14  | 4772.89  | 3529.59  | 3952.71  | 3830.63  | 3155.69  |
| Kdsr      | ENSMUSG00000009905 | 0.011  | 0.945 | 1079.945  | 1096.39  | 1123.42  | 1100.61  | 1140.26  | 1225.02  | 1063.64  | 1012.77  |
| Neu1      | ENSMUSG00000007038 | -0.454 | 0.000 | 13653.005 | 17105.00 | 14179.54 | 16458.69 | 11170.98 | 12448.13 | 10569.24 | 10650.56 |
| Neu2      | ENSMUSG00000079434 | -0.200 | 0.417 | 183.836   | 243.95   | 148.65   | 241.60   | 192.52   | 140.11   | 211.00   | 173.39   |
| Neu3      | ENSMUSG00000035239 | 0.116  | 0.674 | 113.130   | 167.54   | 122.34   | 100.93   | 139.51   | 129.83   | 117.97   | 165.39   |
| Phlpp1    | ENSMUSG00000044340 | 0.044  | 0.767 | 1213.915  | 1462.78  | 1385.20  | 1342.21  | 1408.11  | 1334.28  | 1447.28  | 1478.70  |
| Phlpp2    | ENSMUSG00000031732 | -0.086 | 0.559 | 813.494   | 842.32   | 966.88   | 1017.93  | 854.73   | 813.68   | 889.08   | 876.73   |
| Ppap2b    | ENSMUSG00000028517 | 0.065  | 0.609 | 1722.255  | 1812.59  | 1724.59  | 1808.22  | 2057.30  | 1754.62  | 1927.78  | 1810.36  |
| Sgms1     | ENSMUSG00000040451 | 0.299  | 0.000 | 2400.291  | 2515.90  | 2427.06  | 2582.41  | 3043.16  | 3208.44  | 2951.14  | 2832.92  |
| Sgms2     | ENSMUSG00000050931 | 0.061  | 0.619 | 6211.730  | 6336.24  | 6345.87  | 6598.29  | 6458.35  | 5916.85  | 6741.49  | 7052.95  |
| Sgpl1     | ENSMUSG00000020097 | 0.081  | 0.432 | 2632.505  | 2723.03  | 2399.43  | 2612.47  | 2626.50  | 2762.39  | 2690.26  | 2946.73  |
| Sgpp1     | ENSMUSG00000021054 | 0.283  | 0.029 | 5652.779  | 5315.34  | 5002.77  | 6073.22  | 5915.20  | 7324.39  | 6910.29  | 6061.52  |
| Sgpp2     | ENSMUSG00000032908 | 0.011  | 0.957 | 730.135   | 660.04   | 801.13   | 672.18   | 778.46   | 628.58   | 775.91   | 710.45   |
| Smpd1     | ENSMUSG00000037049 | -0.265 | 0.022 | 2962.220  | 2874.92  | 2537.56  | 2932.46  | 2207.04  | 2379.34  | 2293.20  | 2120.69  |
| Smpd2     | ENSMUSG00000019822 | 0.079  | 0.697 | 1924.699  | 2077.71  | 2019.26  | 1949.96  | 1765.26  | 2173.67  | 2226.06  | 1855.71  |
| Smpd3     | ENSMUSG00000031906 | -0.169 | 0.677 | 22.328    | 11.05    | 17.10    | 11.81    | 16.74    | 16.71    | 17.26    | 13.34    |
| Smpd4     | ENSMUSG00000005899 | -0.038 | 0.751 | 788.933   | 793.53   | 786.66   | 823.58   | 763.58   | 782.83   | 789.34   | 794.92   |
| Sphk1     | ENSMUSG00000061878 | 0.627  | 0.000 | 117.596   | 150.05   | 169.70   | 118.11   | 196.24   | 221.09   | 246.49   | 225.85   |
| Sphk2     | ENSMUSG00000057342 | 0.037  | 0.883 | 1064.315  | 1197.65  | 1512.80  | 1438.85  | 1096.54  | 1410.12  | 1293.82  | 1512.49  |
| Sptlc1    | ENSMUSG00000021468 | -0.060 | 0.748 | 2166.588  | 2002.23  | 1677.24  | 2034.79  | 1789.44  | 2006.56  | 1868.32  | 1660.09  |
| Sptlc2    | ENSMUSG00000021036 | -0.149 | 0.204 | 3510.751  | 3695.14  | 3479.44  | 3779.66  | 3143.61  | 3799.74  | 3137.20  | 3041.87  |
| Sptlc3    | ENSMUSG00000039092 | 0.485  | 0.031 | 66.241    | 65.36    | 59.20    | 92.34    | 91.15    | 129.83   | 77.69    | 114.70   |
| Ugcg      | ENSMUSG00000028381 | -0.183 | 0.139 | 718.971   | 733.69   | 772.19   | 671.10   | 611.05   | 650.43   | 658.90   | 560.18   |
| Ugt8a     | ENSMUSG00000032854 | -0.461 | 0.033 | 5641.615  | 4114.00  | 3955.64  | 3431.76  | 2433.97  | 2488.60  | 3885.30  | 2255.84  |

**Supplemental Table 1. Genes associated with ceramide biosynthesis.** Genes were identified using sphingolipid metabolism KEGG database (Pathway map mmu00600). Differentially expressed genes were identified with Bioconductor package DESeq2 (3.2) and Benjamini and Hochberg's method was used to control for false discovery rate (FDR).

| Gene            | Orientation | Sequence                  |
|-----------------|-------------|---------------------------|
| <i>Aox</i>      | forward     | CAGGAAGAGCAAGGAAGTGG      |
|                 | reverse     | GACATCTGAGCCCCTGTGAT      |
| <i>Cpt1a</i>    | forward     | CATGTCAAGCCAGACGAAGA      |
|                 | reverse     | TGGTAGGAGAGCAGCACCTT      |
| <i>Acs11</i>    | reverse     | CTTGAACCCCTTCTGGATCA      |
|                 | forward     | TGACCTCTCCATGCAGTCAG      |
| <i>Angptl4</i>  | forward     | AGCAGAGATACCTATCAAAGCAGAA |
|                 | reverse     | AGTCATCTCACAGTTGACCAAAAAT |
| <i>Atgl</i>     | forward     | CGCCTTGCTGAGAATCACCAT     |
|                 | reverse     | AGTGAGTGGCTGGTGAAAGGT     |
| <i>Cd36</i>     | forward     | TGTGTTTGGAGGCATTCTCA      |
|                 | reverse     | TGGGTTTTGCACATCAAAGA      |
| <i>Fatp2</i>    | forward     | ATGCCGTGTCCGTCTTTTAC      |
|                 | reverse     | GACCTGTGGTTCCCGAAGTA      |
| <i>Hsl</i>      | forward     | ACACAAATCCCGCTATG         |
|                 | reverse     | CTCGTTGCGTTTGTAGT         |
| <i>Lpl</i>      | forward     | GCTGGTGGGAAATGATGTG       |
|                 | reverse     | TGGACGTTGTCTAGGGGGTA      |
| <i>18s rRNA</i> | forward     | CCATCCAATCGGTAGTAGCG      |
|                 | reverse     | GTAACCCGTTGAACCCCAT       |
| <i>Srebp1c</i>  | forward     | GGAGCCATGGATTGCACATT      |
|                 | reverse     | GGCCCGGGAAGTCACTGT        |
| <i>Vldlr</i>    | forward     | TGACGCAGACTGTTTCAGACC     |
|                 | reverse     | GCCGTGGATACAGCTACCAT      |
| <i>Fasn</i>     | forward     | TTGCTGGCACTACAGAATGC      |
|                 | reverse     | AACAGCCTCAGAGCGACAAT      |
| <i>Dgat1</i>    | forward     | GTGCACAAGTGGTGCATCAG      |
|                 | reverse     | CAGTGGGATCTGAGCCATCA      |
| <i>Dgat2</i>    | forward     | CTGTCACCTGGCTCAACAGA      |
|                 | reverse     | TATCAGCCAGCAGTCTGTGC      |
| <i>Plin2</i>    | forward     | CTACGACGACACCGAT          |
|                 | reverse     | CATTGCGGAATACGGAG         |
| <i>Plin5</i>    | forward     | GTGATCAGACAGCTCAGGACCT    |
|                 | reverse     | CGATTCACCACATTCTGCTGG     |

**Supplemental Table 2. Primer sequences for quantitative PCR.**
